# Supplementary material for: Distinct signatures of lung cancer types: aberrant mucin O-glycosylation and compromised immune response
Source: Springer Nature journal article supplement (doi:10.1186/s12885-019-5965-x), 2019-08-20
Supplement: MOESM4 [file 17086012]

### Color Key

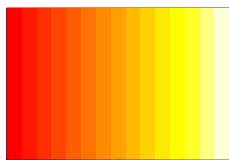

-2 0 2  
Value

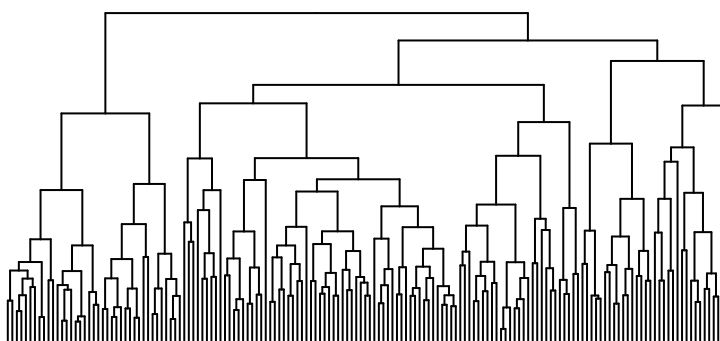

LUAD  
LUSC

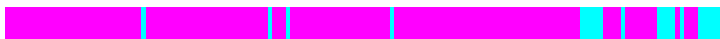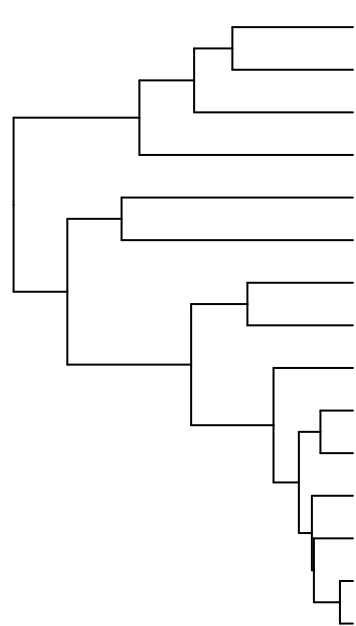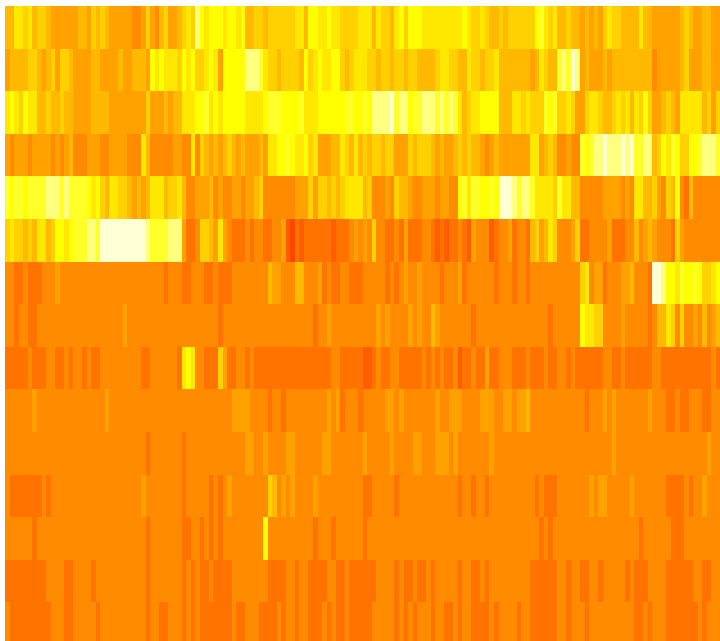

ARSE  
AQP5  
ALDOC  
ITGA6  
AGR2  
MUC5B  
ANXA8  
CSTA  
HABP2  
ICA1  
CHST7  
FZD7  
NRCAM  
ACOX2  
P2RY1
